# Supplementary material
Source: HighWire-hosted journal article supplement (https://heartasia.bmj.com/content/9/2/e010931)
Supplement: inline-supplementary-material-1 [file inline-supplementary-material-1.pdf]

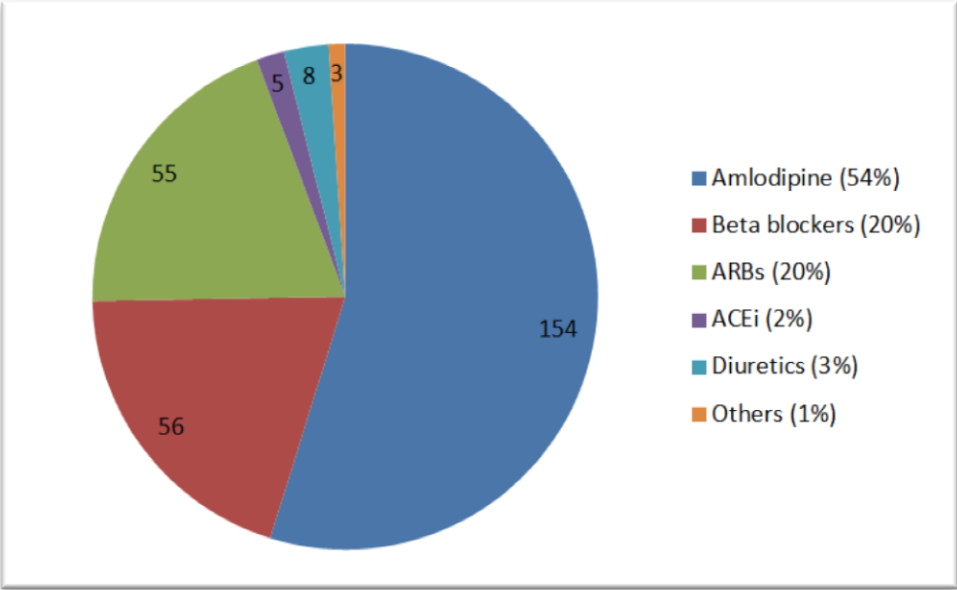

|                            |     |
|----------------------------|-----|
| Amlodipine                 | 154 |
| <b>Beta blockers (20%)</b> |     |
| Atenolol                   | 42  |
| Metoprolol                 | 11  |
| Propranolol                | 1   |
| Timolol                    | 2   |
| <b>ARBs (20%)</b>          |     |
| Losartan                   | 22  |
| Olmesartan                 | 16  |
| Telmisartan                | 17  |
| <b>ACEi (2%)</b>           |     |
| Benazepril                 | 1   |
| Enalapril                  | 2   |
| Lisinopril                 | 1   |
| Ramipril                   | 1   |
| <b>Diuretics (3%)</b>      |     |
| Hydrochlorothiazide        | 6   |
| Chlorthalidone             | 1   |
| Torsemide                  | 1   |
| <b>Others (1%)</b>         |     |
| Clonidine                  | 1   |
| Minoxidil                  | 1   |
| Hydralazine                | 1   |

**Figure S1- Pattern of Medication use in Hypertension**

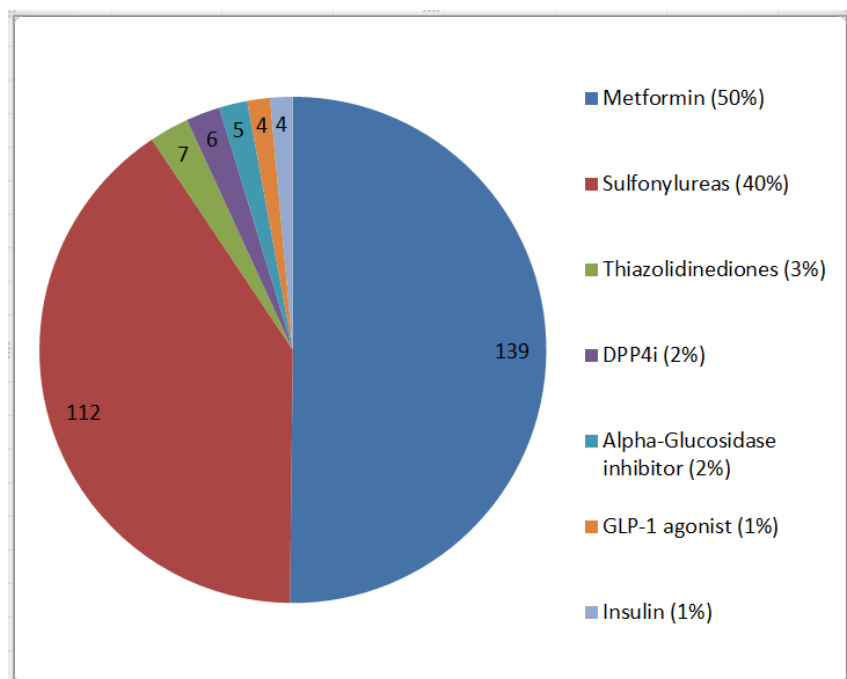

|                                                |     |
|------------------------------------------------|-----|
| Metformin                                      | 139 |
| <b><i>Sulfonylureas (40%)</i></b>              |     |
| Glibenclamide                                  | 39  |
| Glimepiride                                    | 55  |
| Gliclazide                                     | 16  |
| Glipizide                                      | 1   |
| Glyburide                                      | 1   |
| <b><i>Thiazolidinediones (3%)</i></b>          |     |
| Pioglitazone                                   | 7   |
| <b><i>DPP4i (2%)</i></b>                       |     |
| Alogliptin                                     | 1   |
| Sitagliptin                                    | 2   |
| Vildagliptin                                   | 3   |
| <b><i>Alpha-Glucosidase inhibitor (2%)</i></b> |     |
| Voglibose                                      | 5   |
| <b><i>GLP-1 agonist (1%)</i></b>               |     |
| Exenatide                                      | 4   |
| <b><i>Insulin (1%)</i></b>                     |     |
| Insulins                                       | 4   |

**Figure S2- Pattern of Medication use in Diabetes**
